# Supplementary material for: Navigating Support Dilemma: A Socio-Ecological Analysis of Health Management for Women in China Living with Moderate-to-Severe Menopausal Syndrome
Source: Research Square preprint supplement (doi:10.21203/rs.3.rs-7590310/v1), 2025-10-22
Supplement: Supplementary file 1 [file af6fc621f4509b48602638e2.docx]

**Navigating Support Dilemma: A Socio-Ecological Analysis of Health Management for Women in China Living with Moderate-to-Severe Menopausal Syndrome**

YE Qiqi, ZHANG Zhijia, SONG Li, ZHONG Kefu, WU Xuedan, HUANG Qihua

The Final Interview Guide Utilized in This Study

(1) Can you tell me what you know about menopausal syndrome?

(2) How has menopausal syndrome affected your daily life?

(3) What specific strategies do you use to handle the symptoms of menopausal syndrome you're going through right now?

(4) What do you think your family understands and focuses on when it comes to menopausal syndrome?

(5) How much attention do you think your workplace gives to menopausal syndrome? What support measures are provided?

(6) What kind of help are you looking for from doctors, community groups, or other organisations because of your menopausal syndrome symptoms?

(7) If there was a plan to help manage health during menopause, what would you want it to cover?

(8) If there was a system to manage menopausal syndromes differently based on your needs, what do you think about that?
